# Supplementary material for: Recombination proteins differently control the acquisition of homeologous DNA during Bacillus subtilis natural chromosomal transformation
Source: bioRxiv or medRxiv preprint supplement (doi:10.1101/2020.05.13.090589), 2020-05-13
Supplement: Supplementary file [file media-1.pdf]

## *Supplementary Material*

Recombination proteins differently control the acquisition of homeologous DNA during natural *Bacillus subtilis* chromosomal transformation

Ester Serrano<sup>1</sup>, Cristina Ramos<sup>1</sup>, Juan C. Alonso<sup>1, ✉</sup> and Silvia Ayora<sup>1, ✉</sup>

This supplementary material contains

Supplementary Annexes (1 to 3)

Supplementary references

Supplementary Tables (S1 and S2)

Supplementary Figure S1

---

<sup>1</sup>Department of Microbial Biotechnology, Centro Nacional de Biotecnología, CNB-CSIC, 3 Darwin Str, 28049 Madrid, Spain.

✉ Juan C. Alonso [jcalonso@cnb.csic.es](mailto:jcalonso@cnb.csic.es) and Silvia Ayora [sayora@cnb.csic.es](mailto:sayora@cnb.csic.es)

**Annex 1.** Why *Bacillus subtilis* was selected as the experimental system

*B. subtilis* competent cells selected to analyse how the recombination machinery limits heterogamic chromosomal transformation (CT): first, its uptake apparatus internalises any environmental DNA with similar efficiency<sup>1,2</sup>. Second, the recombination between the incoming ssDNA and the non-replicating haploid genome of a competent cell simplifies the interpretation of the data<sup>1,3</sup>. Finally, these cells show no codon usage preferences<sup>4</sup>.

**Annex 2.** Donor DNAs

In all cases, a 2997-bp fragment of the *rpoB482* gene was *in vitro* synthesized and cloned into the *E. coli* pUC57 plasmid<sup>5</sup>. The *rpoB482* mutation is a single C to T transition, that confers Rif<sup>R</sup>, but does not affect RNA polymerase activity. For homogamic CT, plasmid pCB980-borne *rpoB482* of *B. subtilis* 168 (*Bsu* 168 [1 mismatch]) was used. For heterogamic CT the 2997-bp *rpoB482* donor DNA was derived from: i) bacteria of the *B. subtilis* clade, with up to ~8% sequence divergence (SD) (pCB981-borne *rpoB482* of *B. subtilis* W23 (*Bsu* W23 [2.47% SD, 74 mismatches]), pCB982-borne *rpoB482* of *B. atrophaeus* 1942 (*Bat* 1942, 8.35% SD, 250 mismatches]), ii) a bacterium of the *B. amyloliquefaciens* clade with 10.12% SD (pCB983-borne *rpoB482* of *B. amyloliquefaciens* DSM7 (*Bam* DSM7, 303 mismatches]); iii) bacteria of the *B. licheniformis* clade: with 14.52% (pCB984-borne *rpoB482* of *B. licheniformis* DSM13 [*Bli* DSM13, 435 mismatches]) and 17% SD (pCB1054-borne *rpoB482* of *B. gobiensis* FJAT4402 (*Bgo* FJAT4402, 510 mismatches/insertion/deletion)); iv) a bacterium of the *B. thuringiensis* clade with 20.83% SD (pCB985-borne *rpoB482* of *B. thuringiensis* MC28 [*Bth* MC28, 624 mismatches/insertion/deletion]); and v) a far distant *Bacillus* with 22.74% SD (pCB1056-borne *rpoB482* DNA of *B. smithii* DSM4216 [*Bsm* DSM4216, 681 mismatches/insertion/deletion]): All donor *rpoB482* DNAs have similar dG + dC content. Plasmids were purified and used as donor DNA. This *E. coli* plasmid cannot replicate into *B. subtilis* cells, but the homologous *rpoB482* DNA integrates and confers Rif<sup>R</sup> upon CT.

Previously, it has been shown that expression of a plasmid-borne *B. thuringiensis* *rpoB482* gene, which confers Rif<sup>R</sup> and express a RpoB protein with 20.83% SD, shows no apparent fitness cost in the recipient strain <sup>5</sup>

### Annex 3. RecD2 controls the appearance of spontaneous mutations

The rate of appearance of spontaneous Rif<sup>R</sup> mutations was assessed in the different strains listed in Table 1. In the different *rec*<sup>-</sup> strains, the number of Rif<sup>R</sup> colonies that appeared in the absence of *rpoB482* DNA was similar to the *wt* control, except in  $\Delta$ *recD2* cells. The mutation frequencies were similar in the  $\Delta$ *rok* or *rok*<sup>+</sup> backgrounds ( $\sim 7$  to  $9 \times 10^{-9}$ ). However, the frequency of appearance of Rif<sup>R</sup> colonies increased  $\sim 3$ -fold ( $\sim 2$  to  $4 \times 10^{-8}$ ) in competent  $\Delta$ *rok*  $\Delta$ *recD2*, as in  $\Delta$ *recD2* cells <sup>6</sup>. Similarly, inactivation of *recD2* increased 3.6-fold the frequency of spontaneous trimethoprim resistant mutants, and the mutation frequency was also increased in *B. anthracis* *recD2* mutants <sup>7,8</sup>. It becomes clear that RecD2 controls the appearance of spontaneous mutations by an unknown mechanism.

### Supplementary references

- 1 Dubnau, D. & Blokesch, M. Mechanisms of DNA Uptake by Naturally Competent Bacteria. *Annu Rev Genet* **53**, 217-237, doi:10.1146/annurev-genet-112618-043641 (2019).
- 2 Maier, B. Competence and Transformation in *Bacillus subtilis*. *Curr Issues Mol Biol* **37**, 57-76, doi:10.21775/cimb.037.057 (2020).
- 3 Kidane, D., Ayora, S., Sweasy, J. B., Graumann, P. L. & Alonso, J. C. The cell pole: the site of cross talk between the DNA uptake and genetic recombination machinery. *Crit Rev Biochem Mol Biol* **47**, 531-555, doi:10.3109/10409238.2012.729562 (2012).
- 4 Kanaya, S., Yamada, Y., Kudo, Y. & Ikemura, T. Studies of codon usage and tRNA genes of 18 unicellular organisms and quantification of *Bacillus subtilis* tRNAs: gene expression level and species-specific diversity of codon usage based on multivariate analysis. *Gene* **238**, 143-155 (1999).
- 5 Carrasco, B., Serrano, E., Sanchez, H., Wyman, C. & Alonso, J. C. Chromosomal transformation in *Bacillus subtilis* is a non-polar recombination reaction. *Nucleic Acids Res* **44**, 2754-2768, doi:10.1093/nar/gkv1546 (2016).
- 6 Serrano, E., Ramos, C., Ayora, S. & Alonso, J. C. Viral SPP1 DNA is infectious in naturally competent *Bacillus subtilis* cells: inter- and intramolecular recombination pathways. *Environ Microbiol*, doi:10.1111/1462-2920.14908 (2020).
- 7 Walsh, B. W. *et al.* RecD2 helicase limits replication fork stress in *Bacillus subtilis*. *J Bacteriol* **196**, 1359-1368, doi:10.1128/JB.01475-13 (2014).
- 8 Yang, H., Yung, M., Sikavi, C. & Miller, J. H. The role of *Bacillus anthracis* RecD2 helicase in DNA mismatch repair. *DNA Repair (Amst)* **10**, 1121-1130, doi:10.1016/j.dnarep.2011.08.009 (2011).

**Table S1.** Mean integration length during interspecies chromosomal transformation in *ΔaddAB*, *ΔrecO*, *recF15*, *ΔruvAB* and *ΔrecU* mutants

| Genetic background | Divergence (in %) | Left end (MEPS in bp) | Right end (MEPS in bp) | Integration (in bp) <sup>a</sup> |
|--------------------|-------------------|-----------------------|------------------------|----------------------------------|
| <i>ΔaddAB</i>      | 8.35              | 792 (50)              | 1647 (17)              | 855                              |
|                    |                   | 780 (11)              | 1589 (81)              | 809                              |
|                    |                   | 1128 (23)             | 1867 (41)              | 739                              |
|                    |                   | 1152 (23)             | 1729 (23)              | 577                              |
|                    |                   | 1407 (36)             | 1867 (41)              | 460                              |
|                    | 10.12             | 1128 (23)             | 1771 (26)              | 643                              |
|                    |                   | 1152 (20)             | 1771 (26)              | 619                              |
|                    |                   | 1251 (26)             | 1525 (17)              | 274                              |
|                    |                   | 1356 (14)             | 1589 (54)              | 233                              |
|                    |                   | 1371 (14)             | 1589 (54)              | 218                              |
|                    | 14.52             | 1335 (20)             | 1588 (11)              | 253                              |
|                    |                   | 1335 (20)             | 1564 (8)               | 229                              |
|                    |                   | 1335 (20)             | 1555 (17)              | 220                              |
|                    |                   | 1335 (20)             | 1522 (14)              | 187                              |
|                    |                   | 1410 (14)             | 1588 (11)              | 178                              |
|                    |                   | -                     | -                      | (5) <sup>a</sup>                 |
| 17.0               | 1440              | 1448                  | ~8                     |                                  |
|                    | 1441              | 1445                  | ~4                     |                                  |
|                    | 1441              | 1445                  | ~4                     |                                  |
|                    | 1441              | 1445                  | ~4                     |                                  |
|                    | -                 | -                     | (3) <sup>a</sup>       |                                  |
| <i>ΔrecO</i>       | 8.35              | 1251 (18)             | 2132 (33)              | 881                              |
|                    |                   | 780 (11)              | 1589 (81)              | 809                              |
|                    |                   | 1128 (23)             | 1867 (41)              | 739                              |
|                    |                   | 1128 (23)             | 1729 (23)              | 601                              |
|                    |                   | 1128 (23)             | 1647 (17)              | 519                              |
|                    | 10.12             | 1117 (12)             | 1589 (54)              | 472                              |
|                    |                   | 1300 (17)             | 1663 (11)              | 363                              |
|                    |                   | 1300 (17)             | 1589 (54)              | 289                              |
|                    |                   | 1356 (14)             | 1589 (54)              | 233                              |
|                    |                   | 1371 (14)             | 1589 (54)              | 218                              |
|                    | 14.52             | 1309 (11)             | 1555 (17)              | 246                              |
|                    |                   | 1335 (20)             | 1555 (17)              | 220                              |
|                    |                   | 1335 (20)             | 1522 (14)              | 187                              |
|                    |                   | 1410 (14)             | 1588 (11)              | 178                              |
|                    |                   | 1410 (14)             | 1555 (17)              | 145                              |
|                    |                   | -                     | -                      | (4) <sup>a</sup>                 |
| 17.0               | 1441              | 1448                  | ~7                     |                                  |
|                    | 1441              | 1445                  | ~4                     |                                  |
|                    | 1441              | 1445                  | ~4                     |                                  |
|                    | 1441              | 1445                  | ~4                     |                                  |
|                    | -                 | -                     | (3) <sup>a</sup>       |                                  |
|                    | 8.35              | 1251 (18)             | 2132 (33)              | 881                              |
|                    |                   | 780 (11)              | 1589 (81)              | 809                              |
|                    |                   | 792 (50)              | 1589 (81)              | 797                              |
|                    |                   | 954 (35)              | 1729 (23)              | 775                              |
|                    |                   | 954 (35)              | 1589 (81)              | 635                              |
|                    | 10.12             | 1128 (23)             | 1771 (26)              | 643                              |
|                    |                   | 1250 (26)             | 1615 (11)              | 365                              |
|                    |                   | 1251 (26)             | 1589 (54)              | 339                              |
|                    |                   | 1371 (14)             | 1663 (11)              | 292                              |

## Genetic recombination functions

|               |       |           |                  |                  |
|---------------|-------|-----------|------------------|------------------|
| <i>recF15</i> | 14.52 | 1371 (14) | 1589 (54)        | 218              |
|               |       | 1212 (12) | 1690 (14)        | 478              |
|               |       | 1251 (14) | 1715 (11)        | 464              |
|               |       | 1374 (8)  | 1690 (14)        | 316              |
|               |       | 1386 (8)  | 1588 (11)        | 202              |
|               |       | 1335 (20) | 1522 (14)        | 187              |
|               | 17.0  | -         | -                | (5) <sup>a</sup> |
|               |       | 1441      | 1448             | ~7               |
|               |       | 1441      | 1445             | ~4               |
|               |       | 1441      | 1445             | ~4               |
|               | -     | -         | ~4               |                  |
|               | -     | -         | (2) <sup>a</sup> |                  |
| <i>ΔruvAB</i> | 8.35  | 1342 (11) | 1589 (81)        | 211              |
|               |       | 954 (35)  | 1589 (81)        | 635              |
|               |       | 1128 (23) | 1729 (23)        | 601              |
|               |       | 1152 (23) | 1729 (23)        | 577              |
|               |       | 1407 (36) | 1867 (41)        | 460              |
|               | 10.12 | 1128 (23) | 1771 (26)        | 643              |
|               |       | 1150 (20) | 1771 (26)        | 621              |
|               |       | 1250 (26) | 1525 (17)        | 275              |
|               |       | 1371 (14) | 1615 (11)        | 244              |
|               | 14.52 | 1371 (14) | 1589 (54)        | 218              |
|               |       | 1335 (20) | 1690 (14)        | 355              |
|               |       | 1335 (20) | 1588 (11)        | 253              |
|               |       | 1335 (20) | 1555 (17)        | 220              |
|               |       | 1335 (20) | 1507 (14)        | 172              |
|               |       | 1410 (14) | 1555 (17)        | 145              |
|               | 17.0  | 1439      | 1445             | ~6               |
|               |       | 1441      | 1448             | ~7               |
| 1441          |       | 1445      | ~4               |                  |
| 1441          |       | 1445      | ~4               |                  |
|               | -     | -         | (5) <sup>a</sup> |                  |
| <i>ΔrecU</i>  | 8.35  | 780 (11)  | 1589 (81)        | 809              |
|               |       | 1128 (23) | 1867 (41)        | 739              |
|               |       | 954 (35)  | 1589 (81)        | 635              |
|               |       | 1128 (23) | 1729 (23)        | 601              |
|               |       | 1407 (36) | 1867 (41)        | 460              |
|               | 10.12 | 1128 (23) | 1771 (26)        | 643              |
|               |       | 1128 (23) | 1589 (54)        | 461              |
|               |       | 1250 (26) | 1525 (17)        | 275              |
|               |       | 1334 (11) | 1589 (54)        | 255              |
|               | 14.52 | 1356 (14) | 1589 (54)        | 233              |
|               |       | 1335 (20) | 1690 (14)        | 355              |
|               |       | 1335 (20) | 1648 (11)        | 313              |
|               |       | 1335 (20) | 1555 (17)        | 220              |
|               |       | 1335 (20) | 1522 (14)        | 187              |
|               |       | 1410 (14) | 1555 (17)        | 145              |
|               | 17.0  | -         | -                | (3) <sup>a</sup> |
|               |       | 1441      | 1448             | ~8               |
| 1441          |       | 1445      | ~4               |                  |
| 1441          |       | 1445      | ~4               |                  |
|               | 1441  | 1445      | ~4               |                  |
|               | -     | -         | (3) <sup>a</sup> |                  |

Five Rif<sup>R</sup> clones for each condition are documented. <sup>a</sup>The number of spontaneous Rif<sup>R</sup> clones analysed (non-genuine transformants) are denoted between parentheses.

**Table S2.** Mean integration length during interspecies chromosomal transformation in *ΔrecD2*, *ΔrecX*, *ΔradA* *ΔrecJ* and *ΔdprA* mutants

| Genetic background | Divergence (in %) | Left end (MEPS in bp) | Right end (MEPS in bp) | Integration (in bp) <sup>a</sup> |
|--------------------|-------------------|-----------------------|------------------------|----------------------------------|
| <i>ΔrecD2</i>      | 8.35              | 633 (11)              | 1969 (20)              | 1336                             |
|                    |                   | 1128 (23)             | 1589 (81)              | 461                              |
|                    |                   | 1394 (11)             | 2980 (13)              | 1585                             |
|                    |                   | 1370 (36)             | 1589 (81)              | 219                              |
|                    |                   | -                     | -                      | (13) <sup>a</sup>                |
| 10.12              | 10.12             | 805 (29)              | 1589 (54)              | 784                              |
|                    |                   | 1151 (20)             | 1589 (54)              | 438                              |
|                    |                   | 1371 (14)             | 1589 (54)              | 218                              |
|                    |                   | 1386 (53)             | 1589 (54)              | 203                              |
|                    |                   | -                     | -                      | (21) <sup>a</sup>                |
| 14.52              | 1395 (11)         | 1555 (17)             | 160                    |                                  |
|                    |                   | -                     | -                      | (18) <sup>a</sup>                |
| 17.0               | -                 | -                     | -                      | (25) <sup>a</sup>                |
| <i>ΔrecX</i>       | 8.35              | 1152 (23)             | 1729 (23)              | 574                              |
|                    |                   | 1116 (12)             | 1589 (81)              | 473                              |
|                    |                   | 1407 (36)             | 1867 (41)              | 460                              |
|                    |                   | 1344 (20)             | 1589 (81)              | 245                              |
|                    |                   | -                     | -                      | (5) <sup>a</sup>                 |
| 10.12              | 10.12             | 1251 (26)             | 1589 (54)              | 338                              |
|                    |                   | 1251 (26)             | 1525 (17)              | 274                              |
|                    |                   | 1335 (20)             | 1615 (11)              | 280                              |
|                    |                   | 1371 (14)             | 1525 (17)              | 154                              |
|                    |                   | -                     | -                      | (12) <sup>a</sup>                |
| 14.52              | -                 | -                     | -                      | (25) <sup>a</sup>                |
| <i>ΔradA</i>       | 8.35              | 1 (158)               | 1909 (23)              | 1909                             |
|                    |                   | 780 (11)              | 1589 (81)              | 809                              |
|                    |                   | 792 (50)              | 1589 (81)              | 797                              |
|                    |                   | 954 (35)              | 1729 (23)              | 775                              |
|                    |                   | 954 (35)              | 1589 (81)              | 635                              |
| 10.12              | 1371 (14)         | 1589 (54)             | 218                    |                                  |
|                    |                   | -                     | -                      | (22) <sup>a</sup>                |
| 14.52              | -                 | -                     | -                      | (30) <sup>a</sup>                |
| <i>ΔrecJ</i>       | 8.35              | 407 (77)              | 1774 (11)              | 1367                             |
|                    |                   | 1152 (23)             | 1589 (81)              | 437                              |
|                    |                   | 1370 (23)             | 1589 (81)              | 219                              |
|                    |                   | 1370 (23)             | 1729 (23)              | 359                              |
|                    |                   | 1370 (23)             | 1639 (17)              | 269                              |
|                    |                   | -                     | -                      | (5) <sup>a</sup>                 |
| 10.12              | 1438 (53)         | 1589 (54)             | 151                    |                                  |
|                    |                   | -                     | -                      | (20) <sup>a</sup>                |
| 14.52              | -                 | -                     | -                      | (25) <sup>a</sup>                |
| <i>ΔdprA</i>       | 8.35              | 1128 (23)             | 1867 (41)              | 739                              |
|                    |                   | 954 (35)              | 1589 (81)              | 635                              |
|                    |                   | 1251 (14)             | 1774 (11)              | 523                              |
|                    |                   | 1407 (36)             | 1867 (41)              | 460                              |
|                    |                   | -                     | -                      | (6) <sup>a</sup>                 |
| 10.12              | -                 | -                     | -                      | (25) <sup>a</sup>                |
| 14.52              | -                 | -                     | -                      | (25) <sup>a</sup>                |
| 17.0               | -                 | -                     | -                      | (20) <sup>a</sup>                |

When available 5 Rif<sup>R</sup> clones for each condition are documented. <sup>a</sup>The number of spontaneous Rif<sup>R</sup> clones analysed (non-genuine transformants) are denoted between parentheses.

**Figure S1**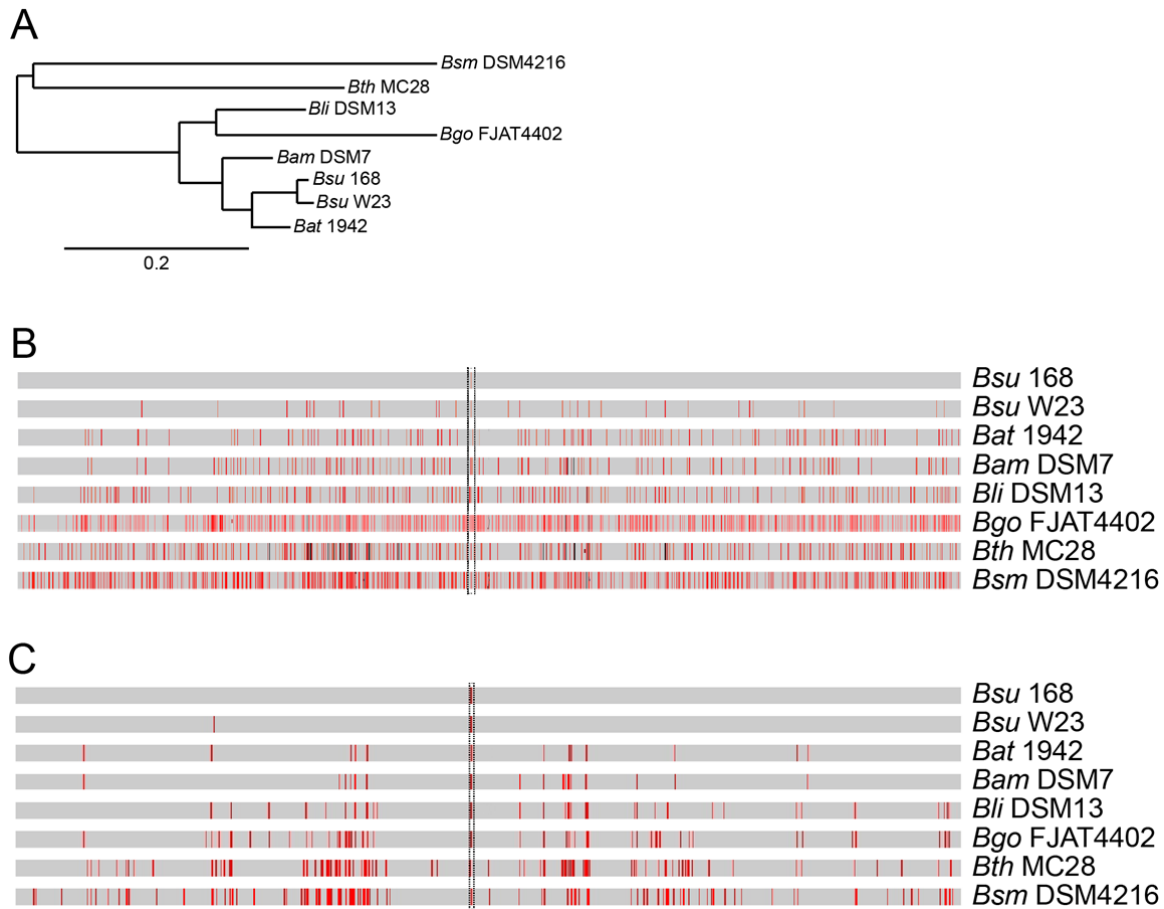

**Supplementary Figure 1.** Distribution of sequence divergence among different *Bacillus* species. (A) Phylogenetic tree of the selected *Bacillus* species or subspecies based on the *rpoB* nucleotide sequence. Branching confidence values are based on 1,000 bootstrap replicates. (B) Nucleotide sequence differences between the different *Bacilli* genes. A single C-to-T transition mutation at codon 482 (framed by dotted lines), which is centrally located (at position 1443) in the *rpoB482* gene confers *Rif<sup>R</sup>*. The *rpoB482* DNA was derived from *B. subtilis* 168 (*Bsu* 168), *B. subtilis* W23 (*Bsu* W23), *B. atrophaeus* 1942 (*Bat* 1942), *B. amyloliquefaciens* DSM7 (*Bam* DSM7), *B. licheniformis* DSM13 (*Bli* DSM13), *B. gobiensis* FJAT-4402 (*Bgo* FJAT4402), *B. thuringiensis* MC28 (*Bth* MC28) and *B. smithii* DSM4512 (*Bsm* DSM4216). Mismatches between donor and recipient are indicated by vertical red bars, and insertions/deletions by vertical black bars. Bar thickness represents the number of mismatches in the neighbourhood. (C) Sequence alignment of the RpoB protein from *Bsu* 168, *Bsu* W23, *Bat* 1942, *Bam* DSM7, *Bli* DSM13, *Bgo* FJAT4402, *Bth* MC28 and *Bsm* DSM4216. The proteins have a high degree of sequence identity (grey). Conserved replacements are indicated by vertical red bars and non-conserved residues by black bars. The alignments were performed using BLAST.
